# Supplementary figures and images for: Terpenoid Biosynthesis Dominates among Secondary Metabolite Clusters in Mucoromycotina Genomes
Source: MDPI journal article supplement (doi:10.3390/jof7040285), 2021-04-09

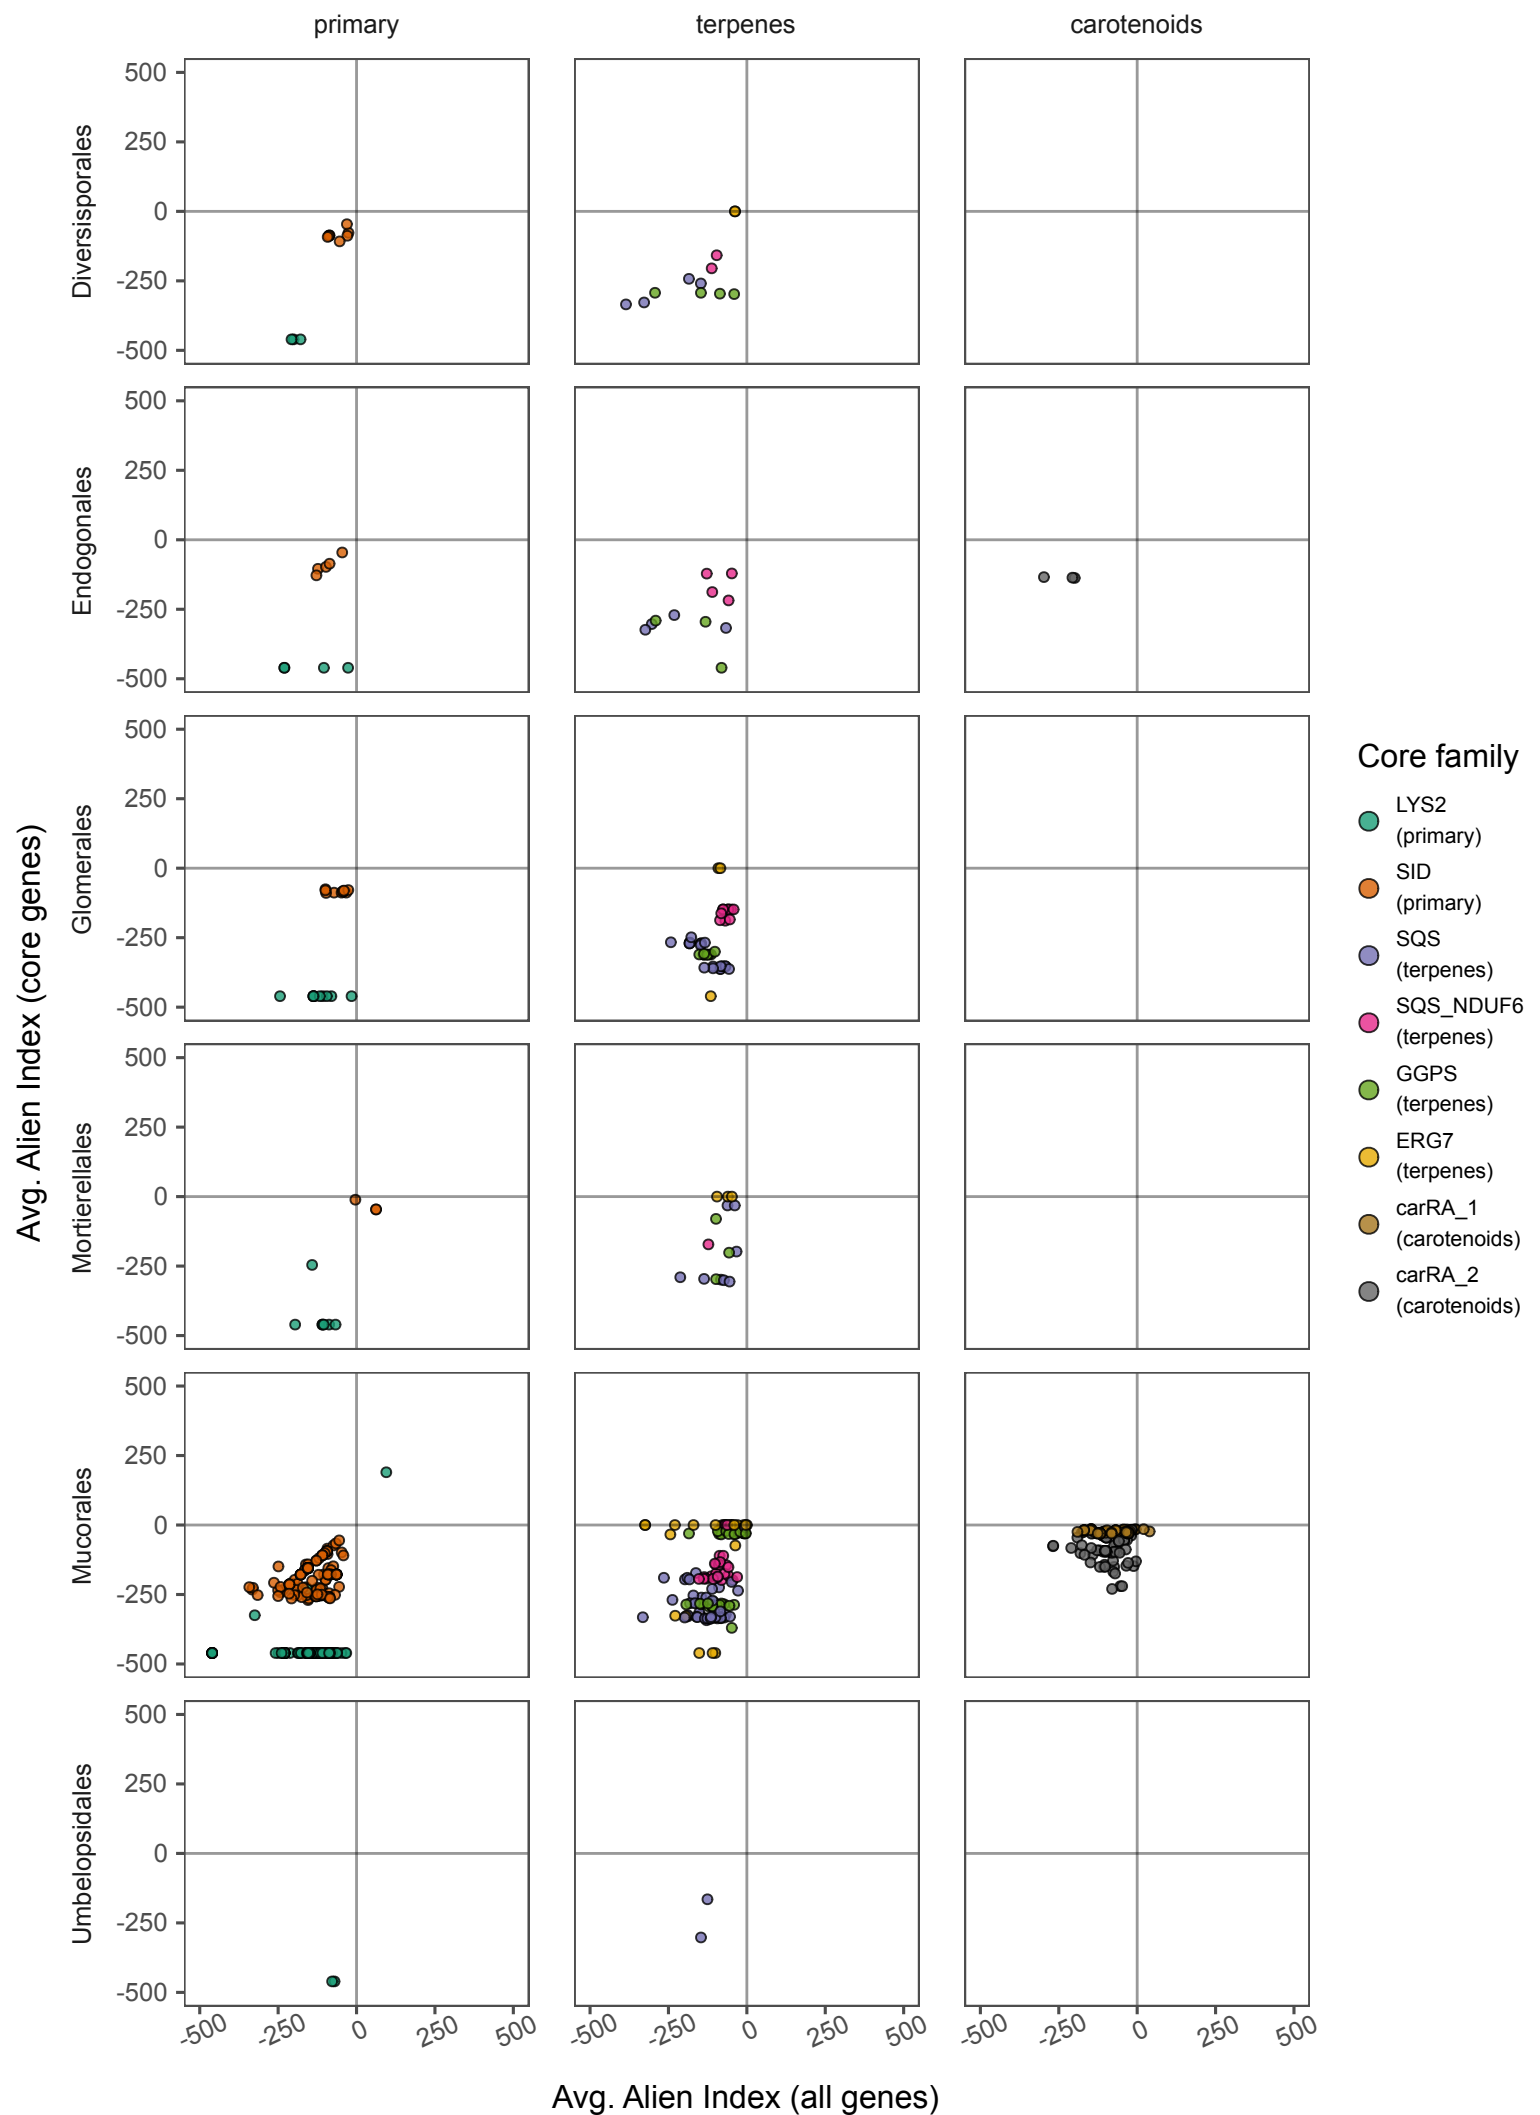

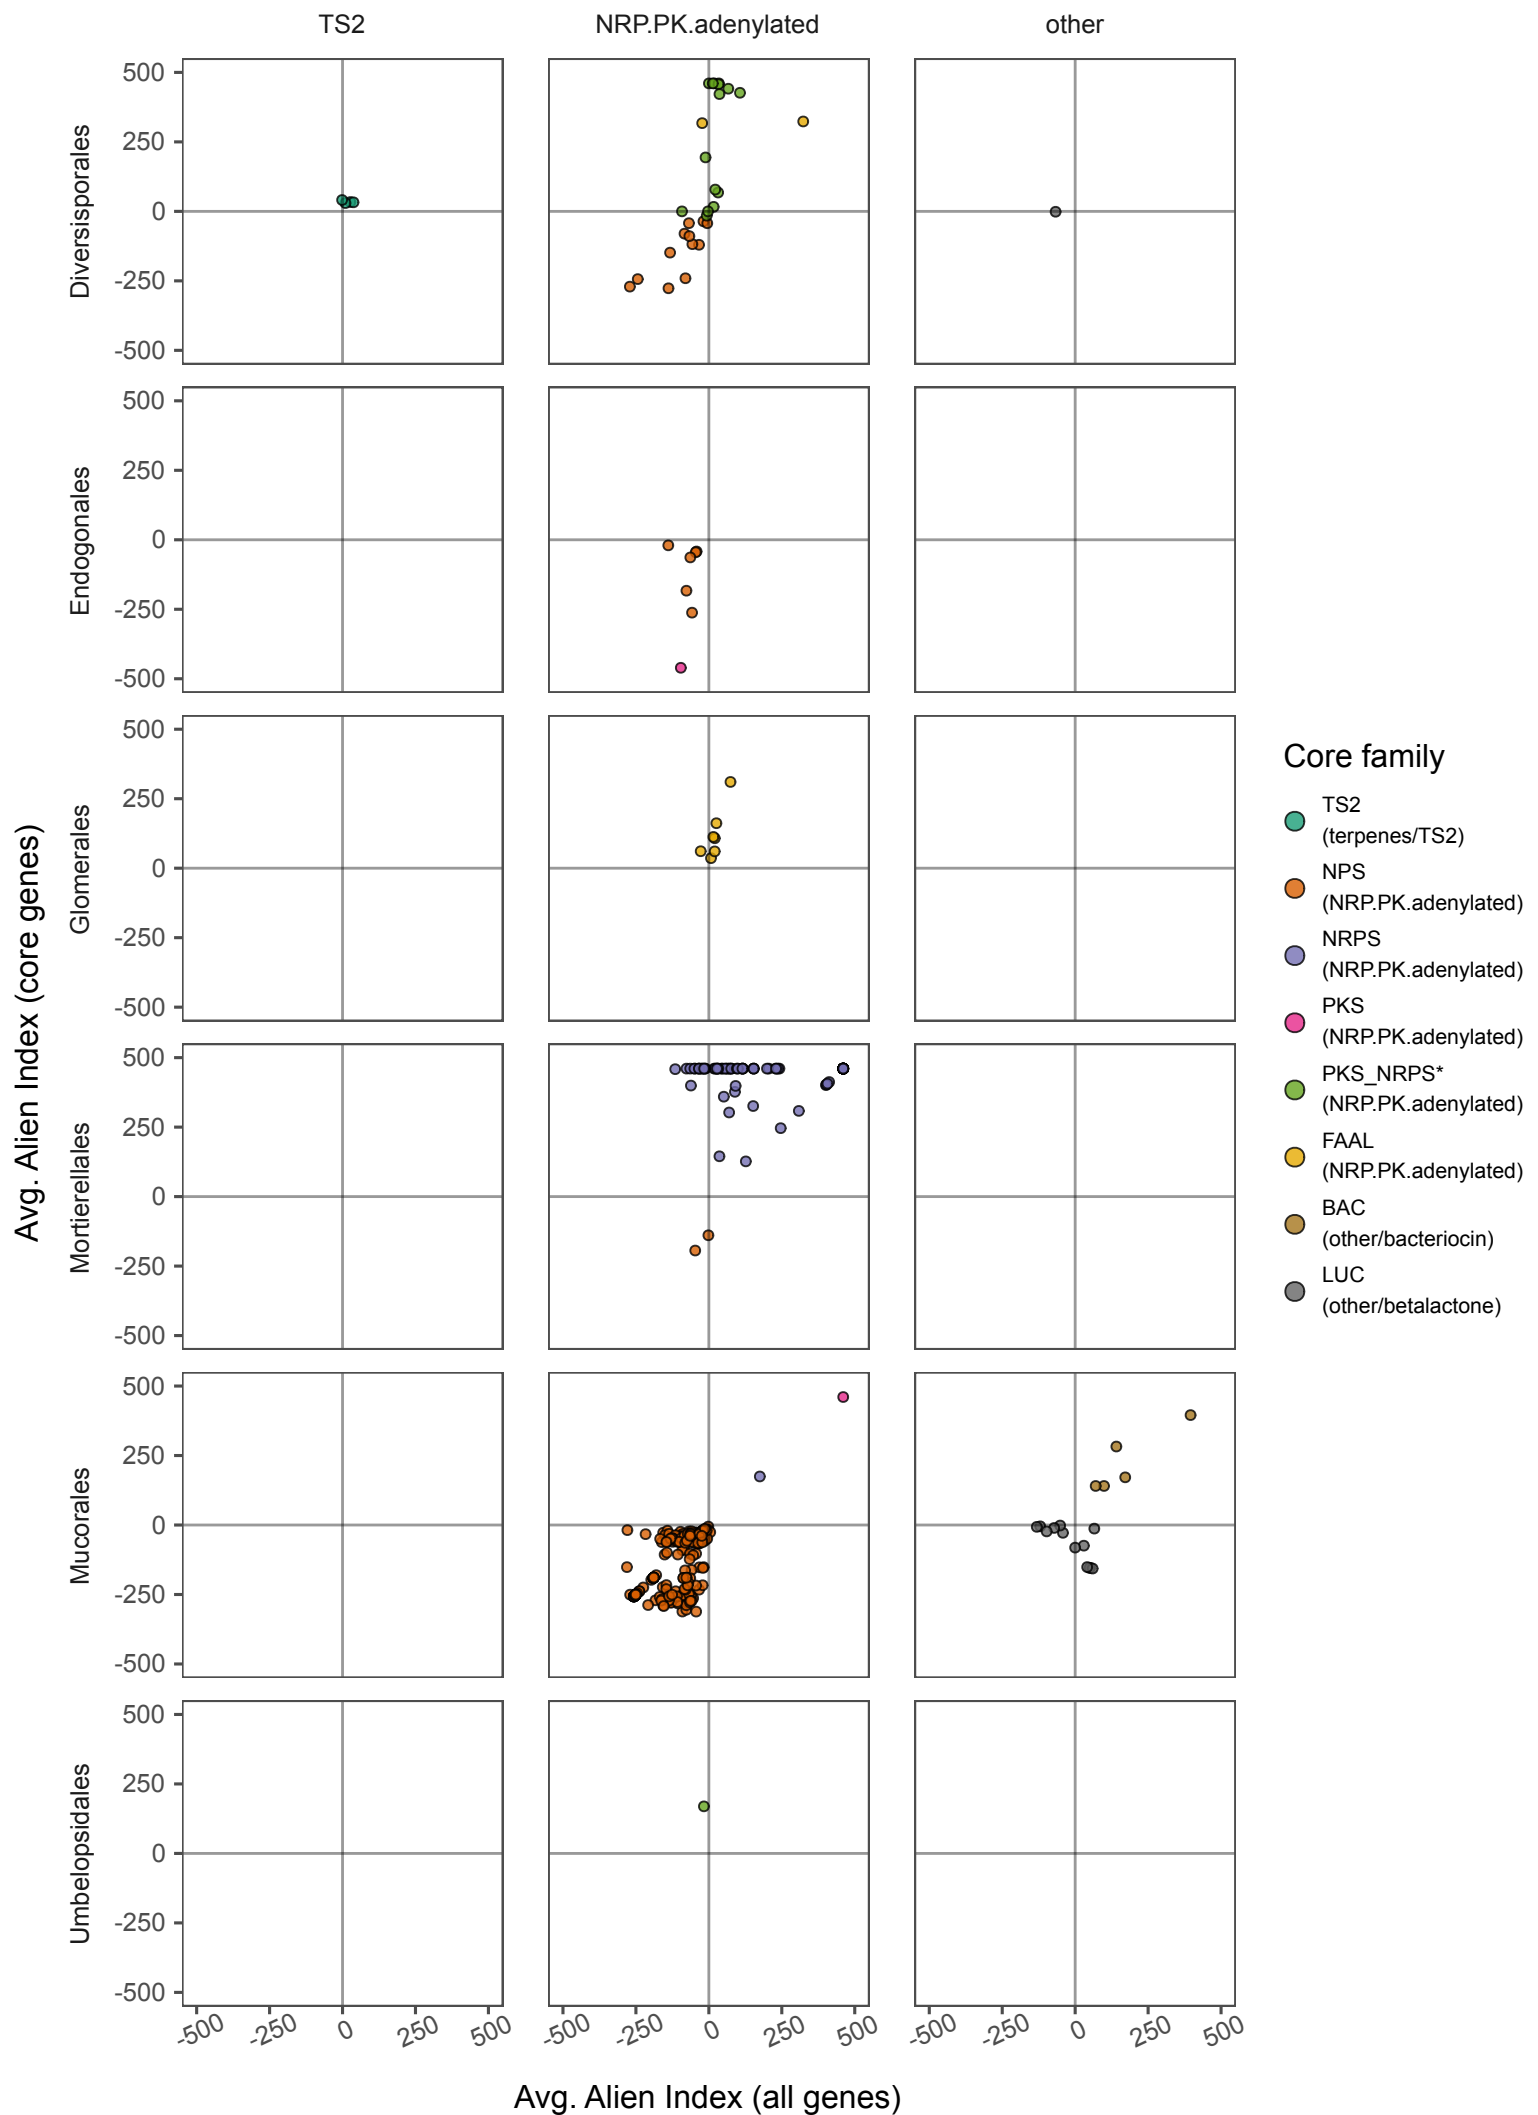

Supplement: s1 [file s1]

## NRPS-like

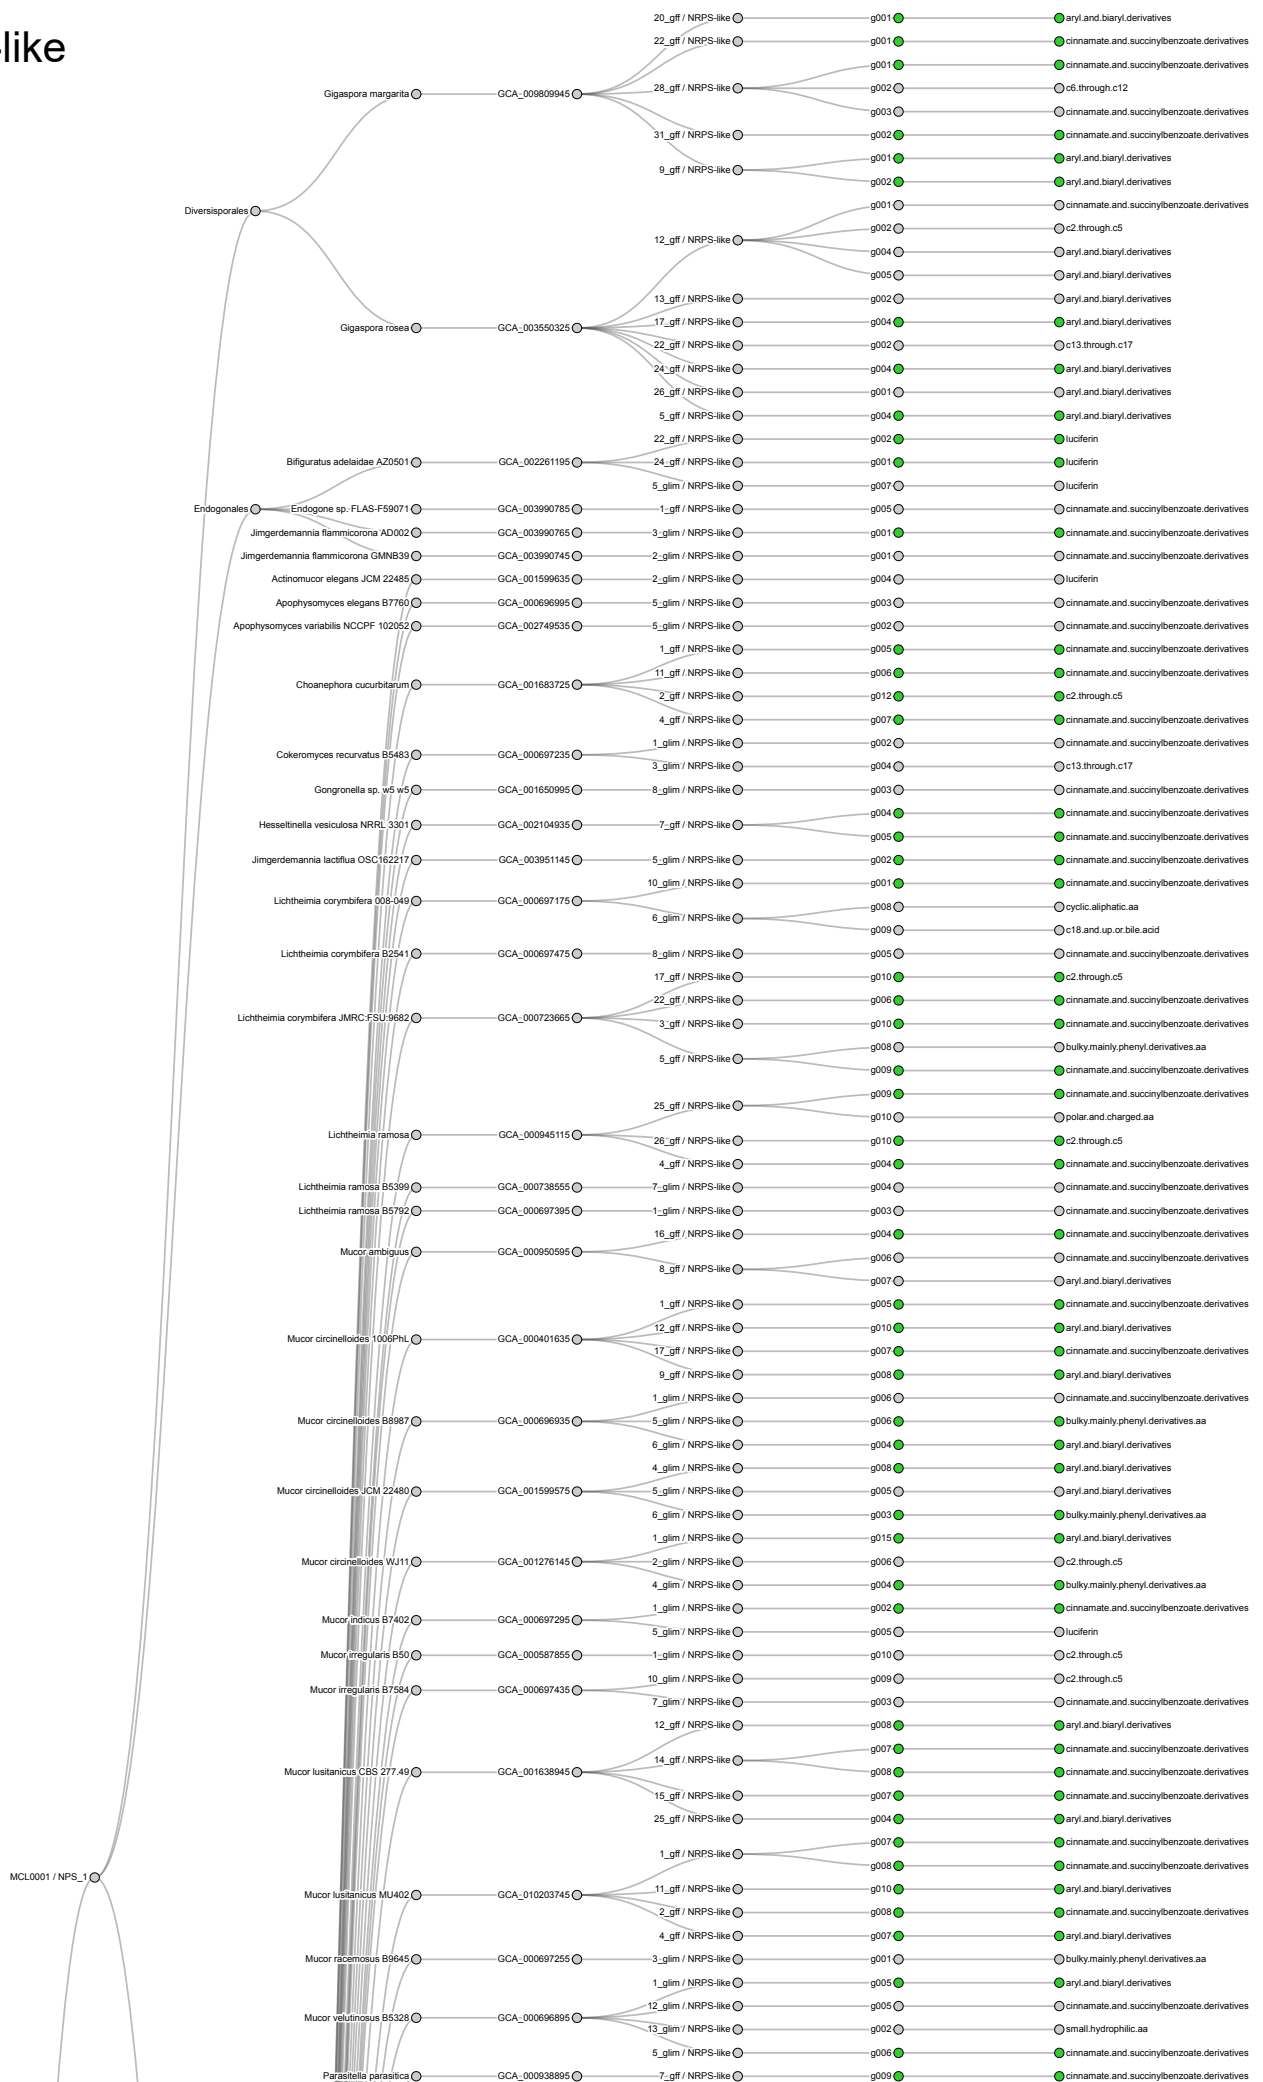

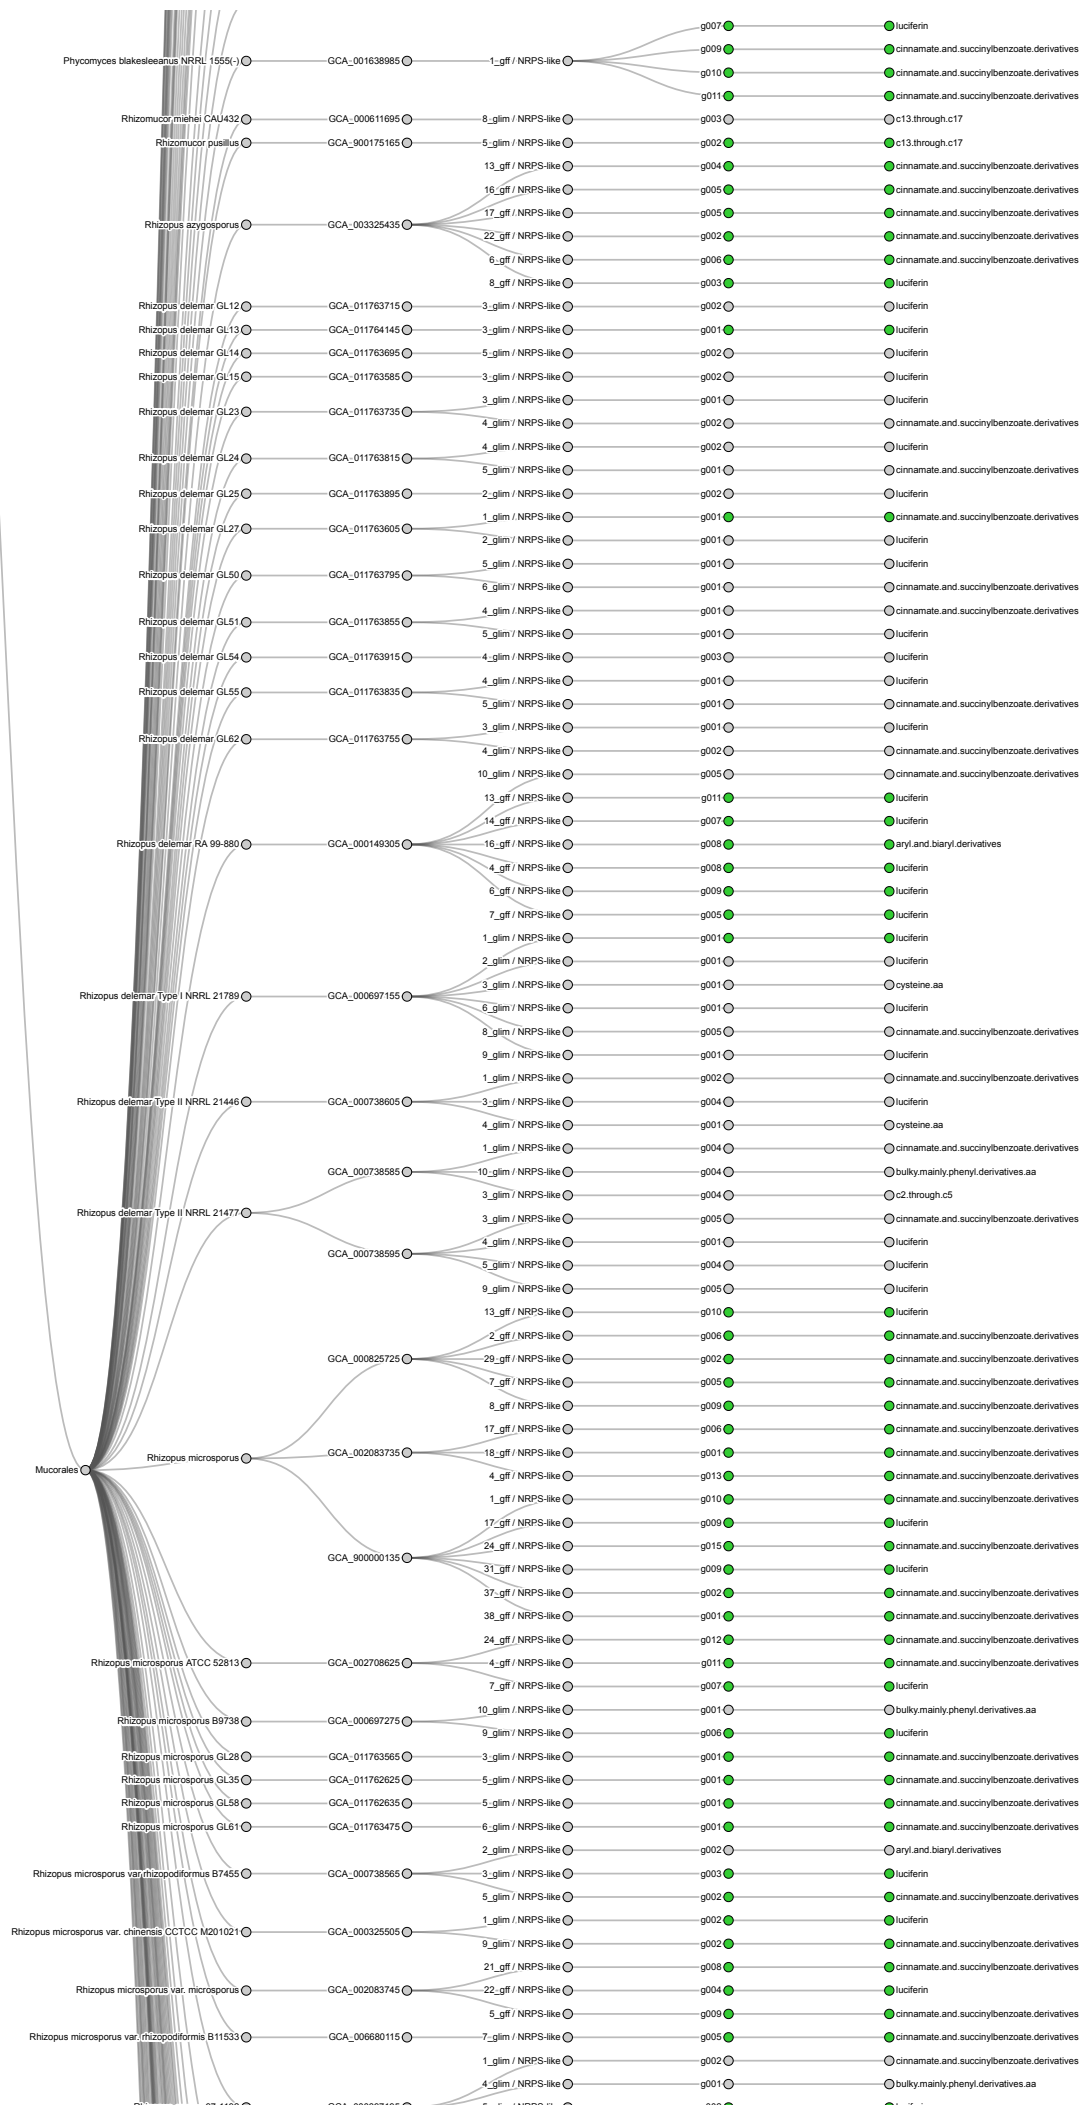

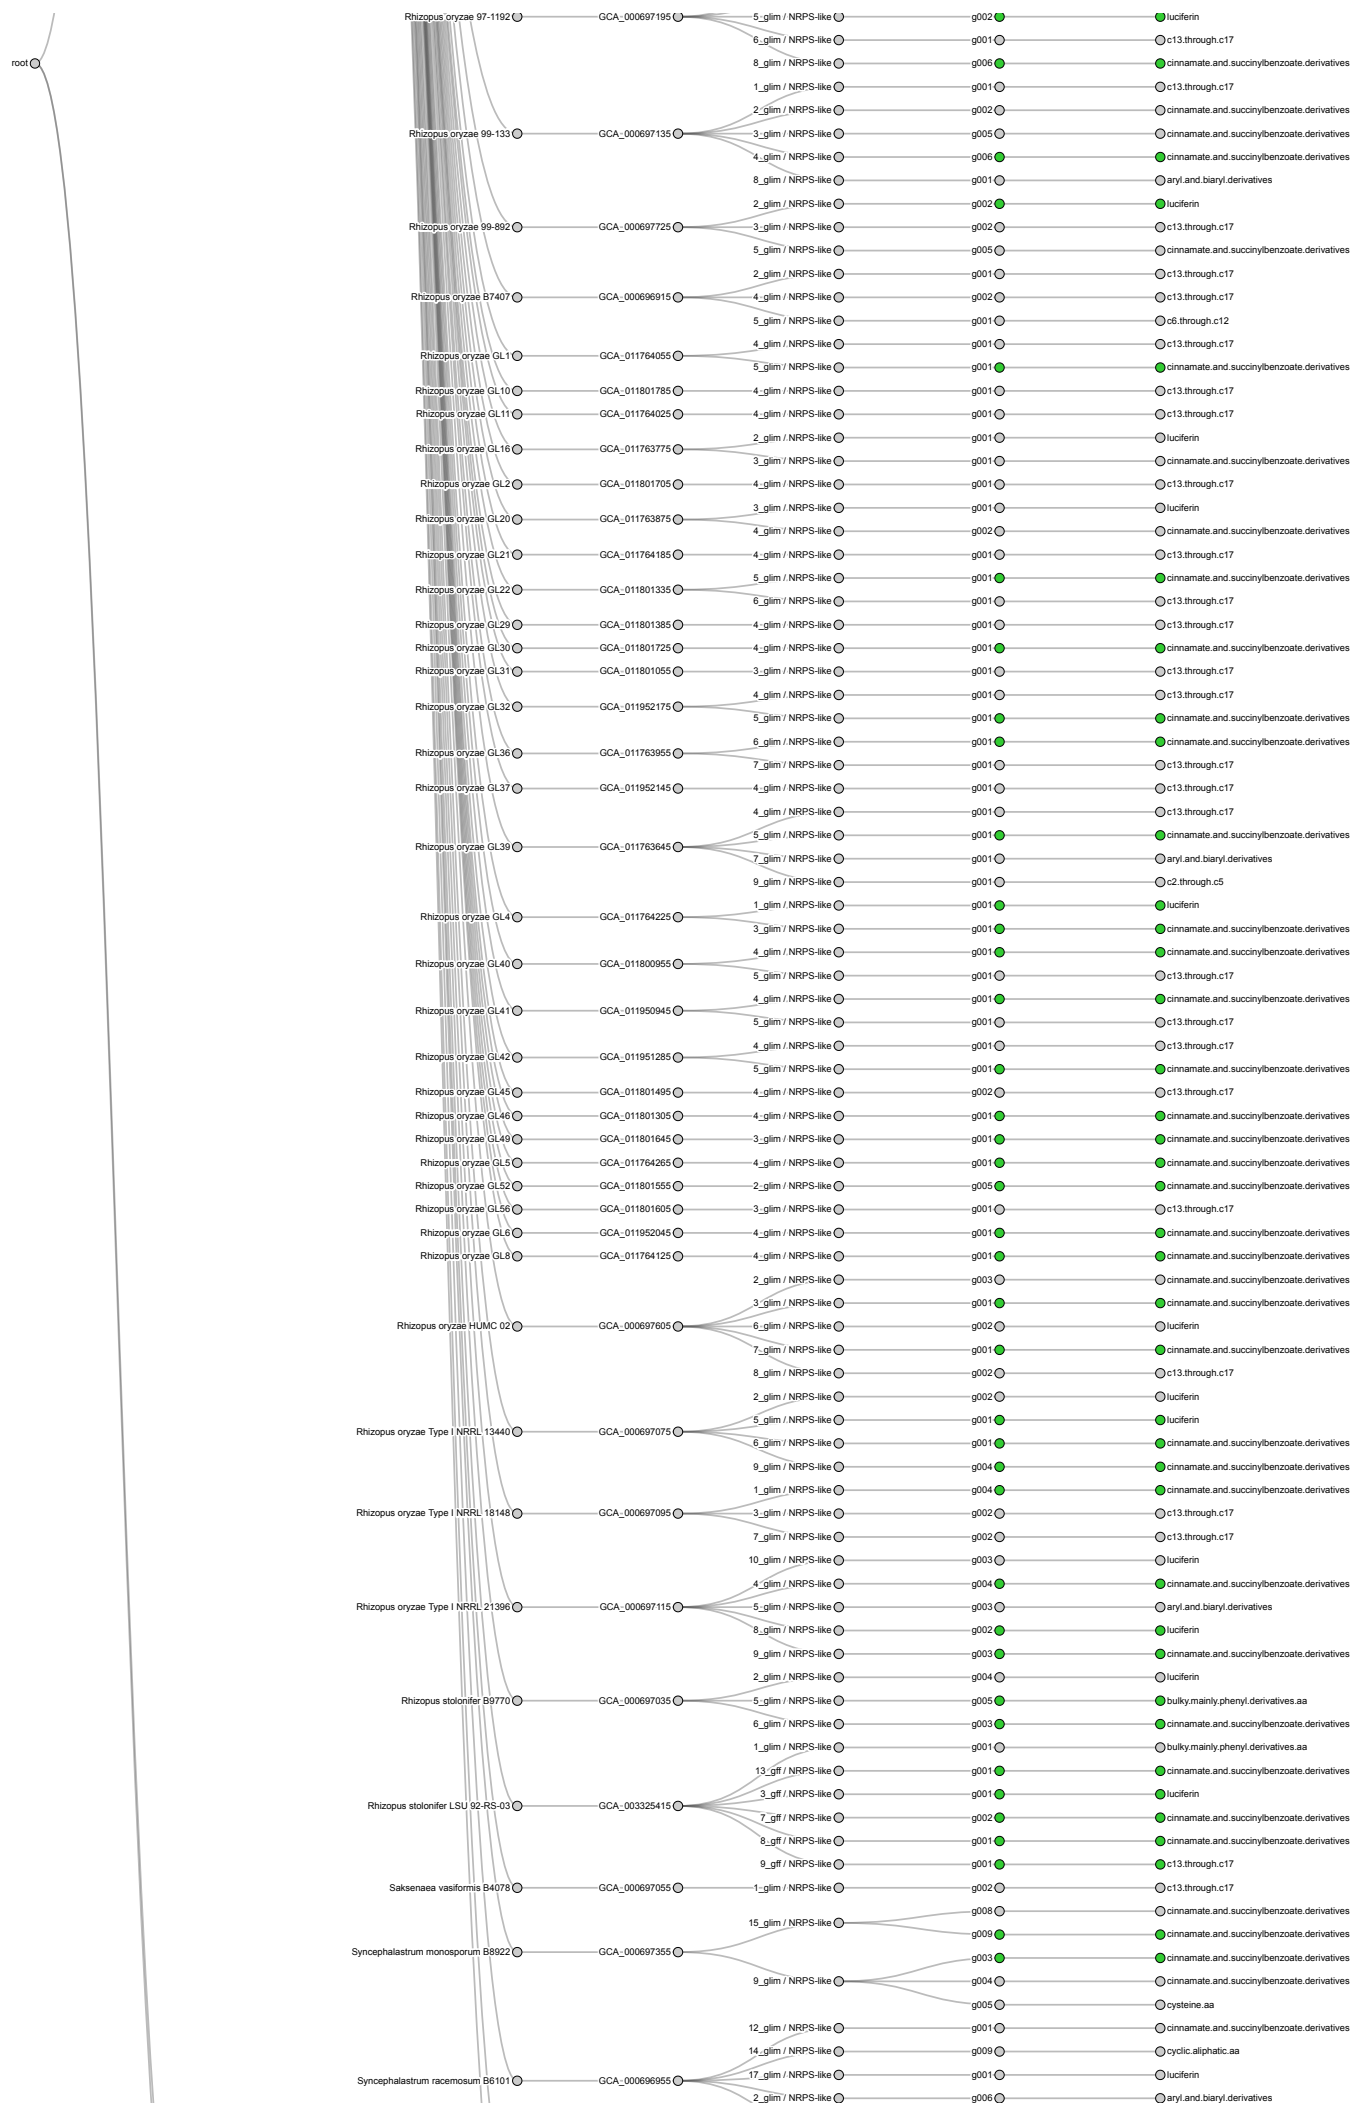

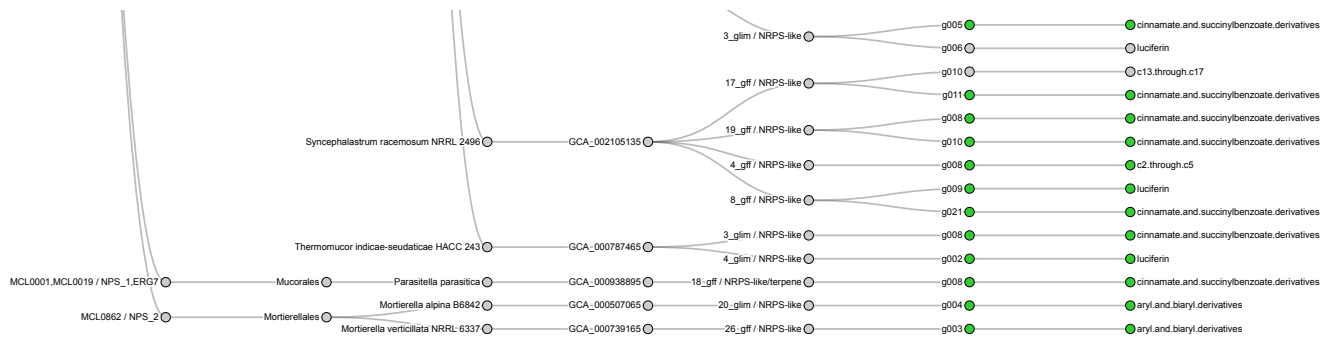



## NRPS

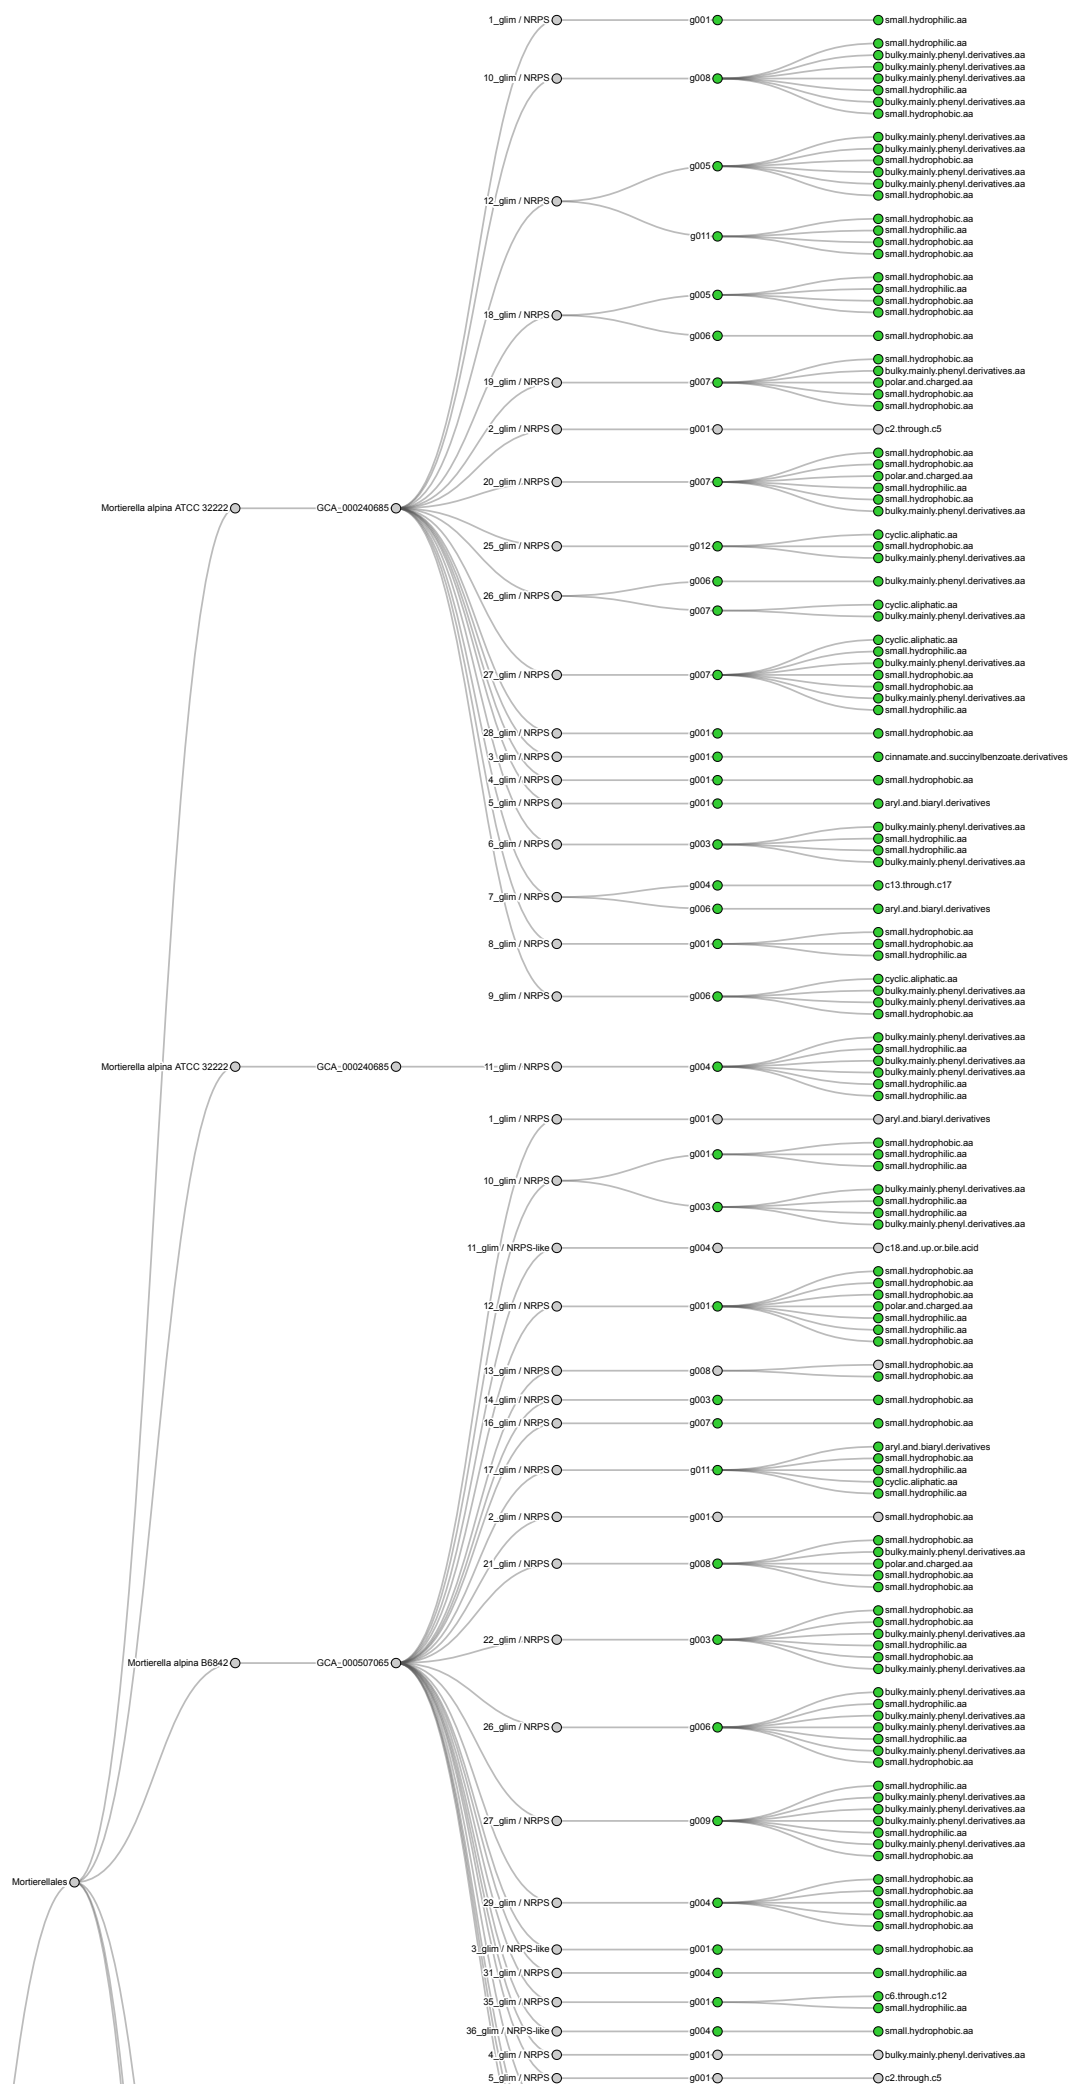

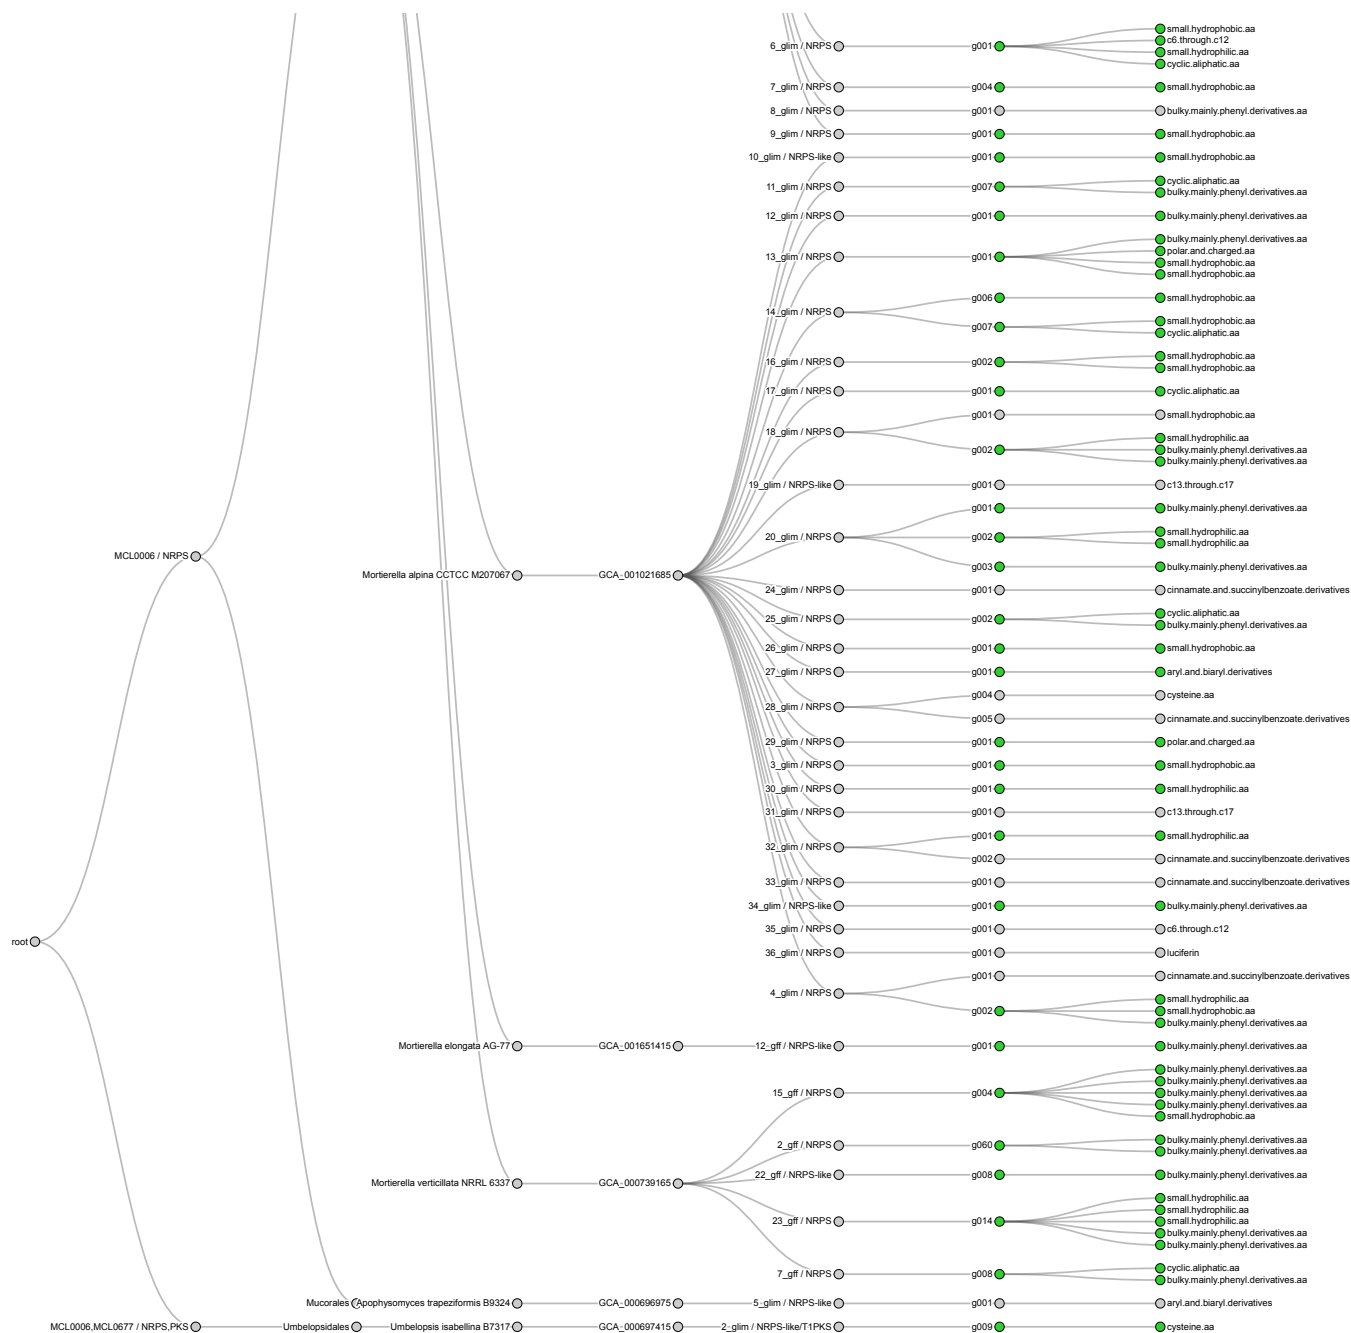

LYS2

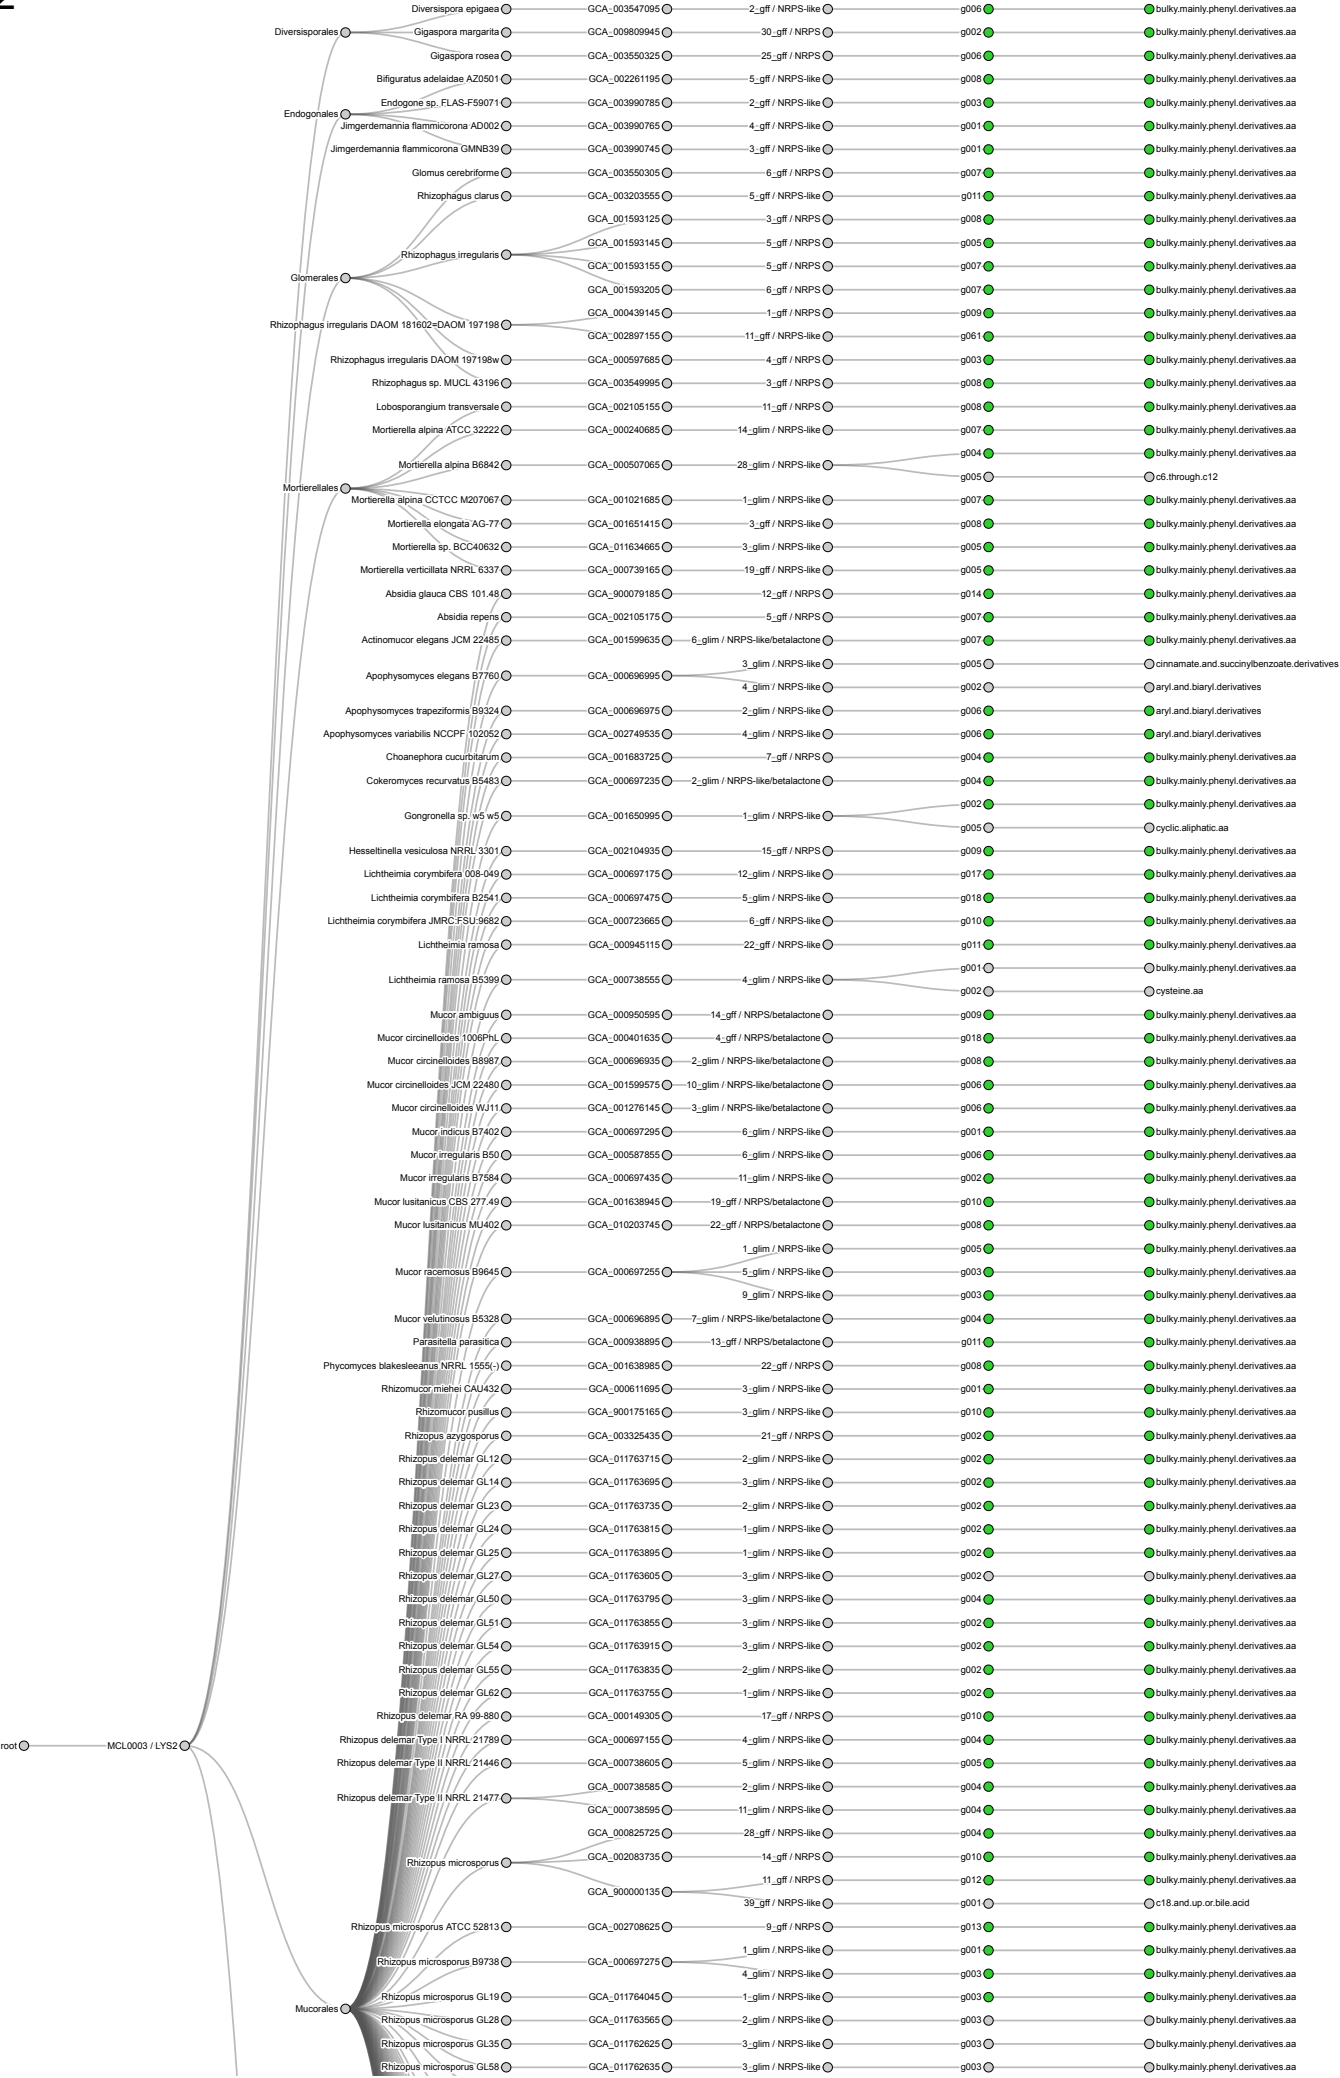

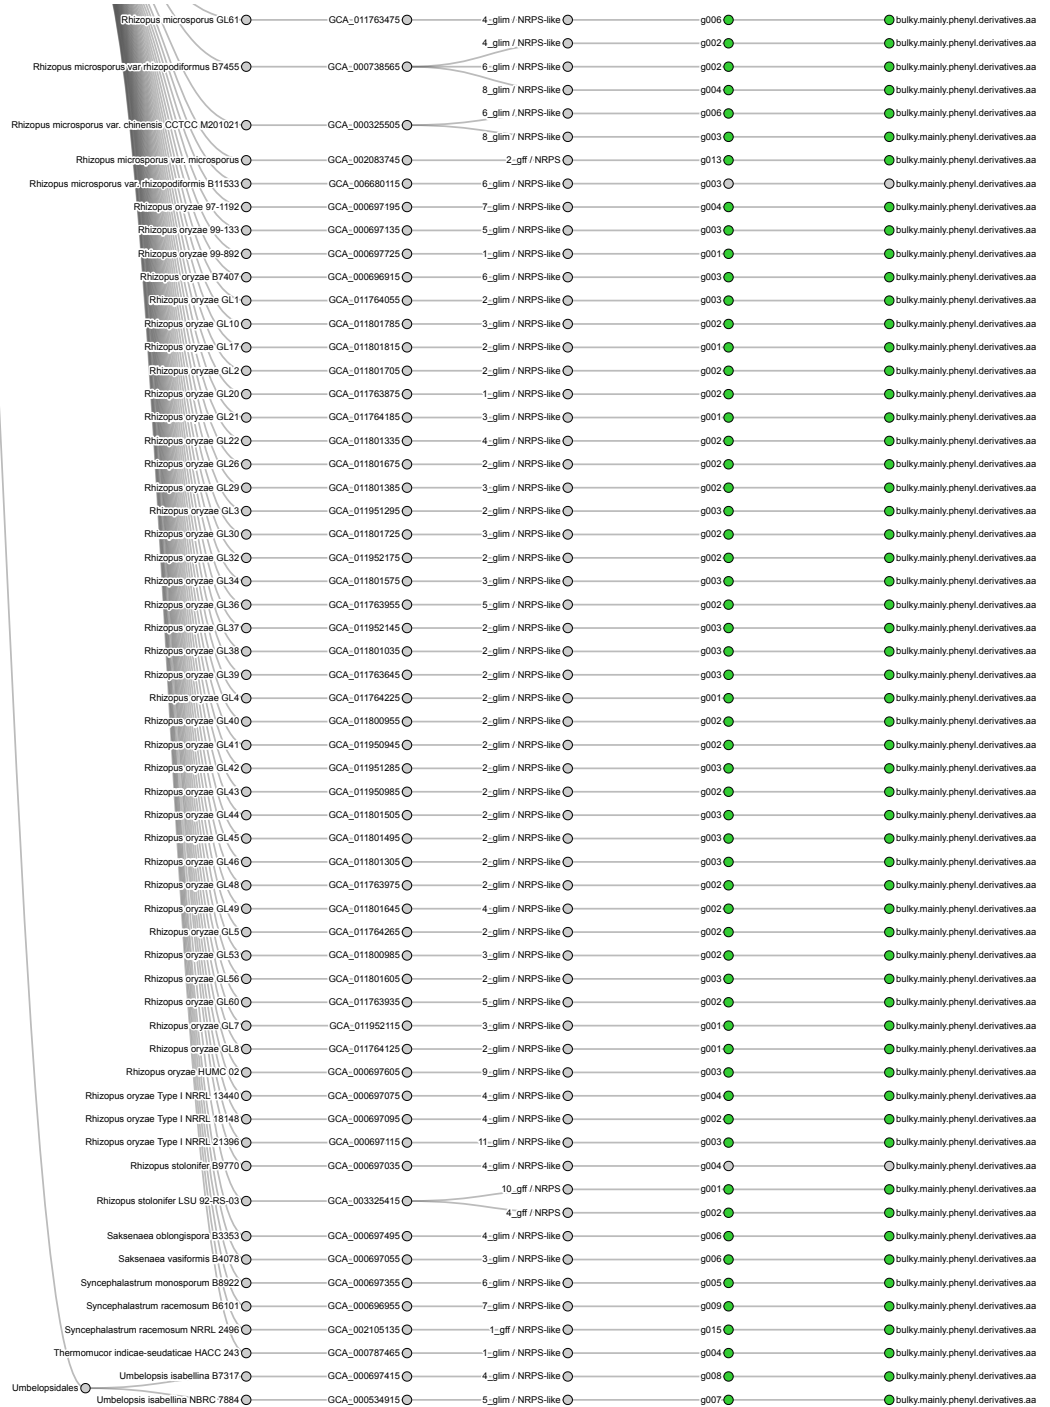

NRPS-PKS

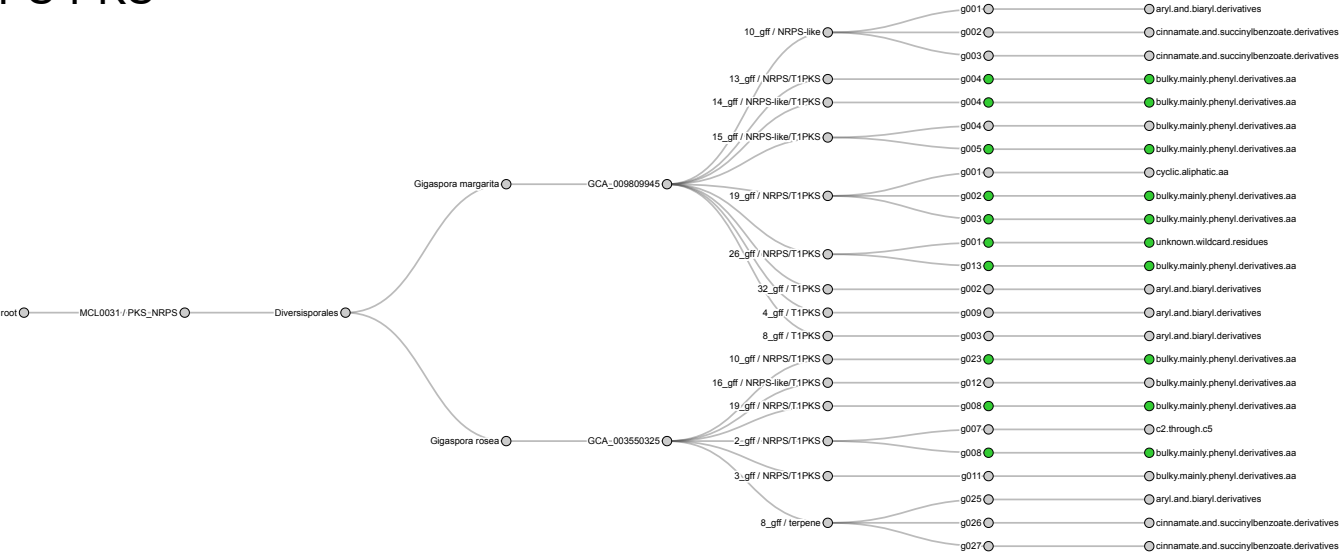

Supplement: s1 [file s1]

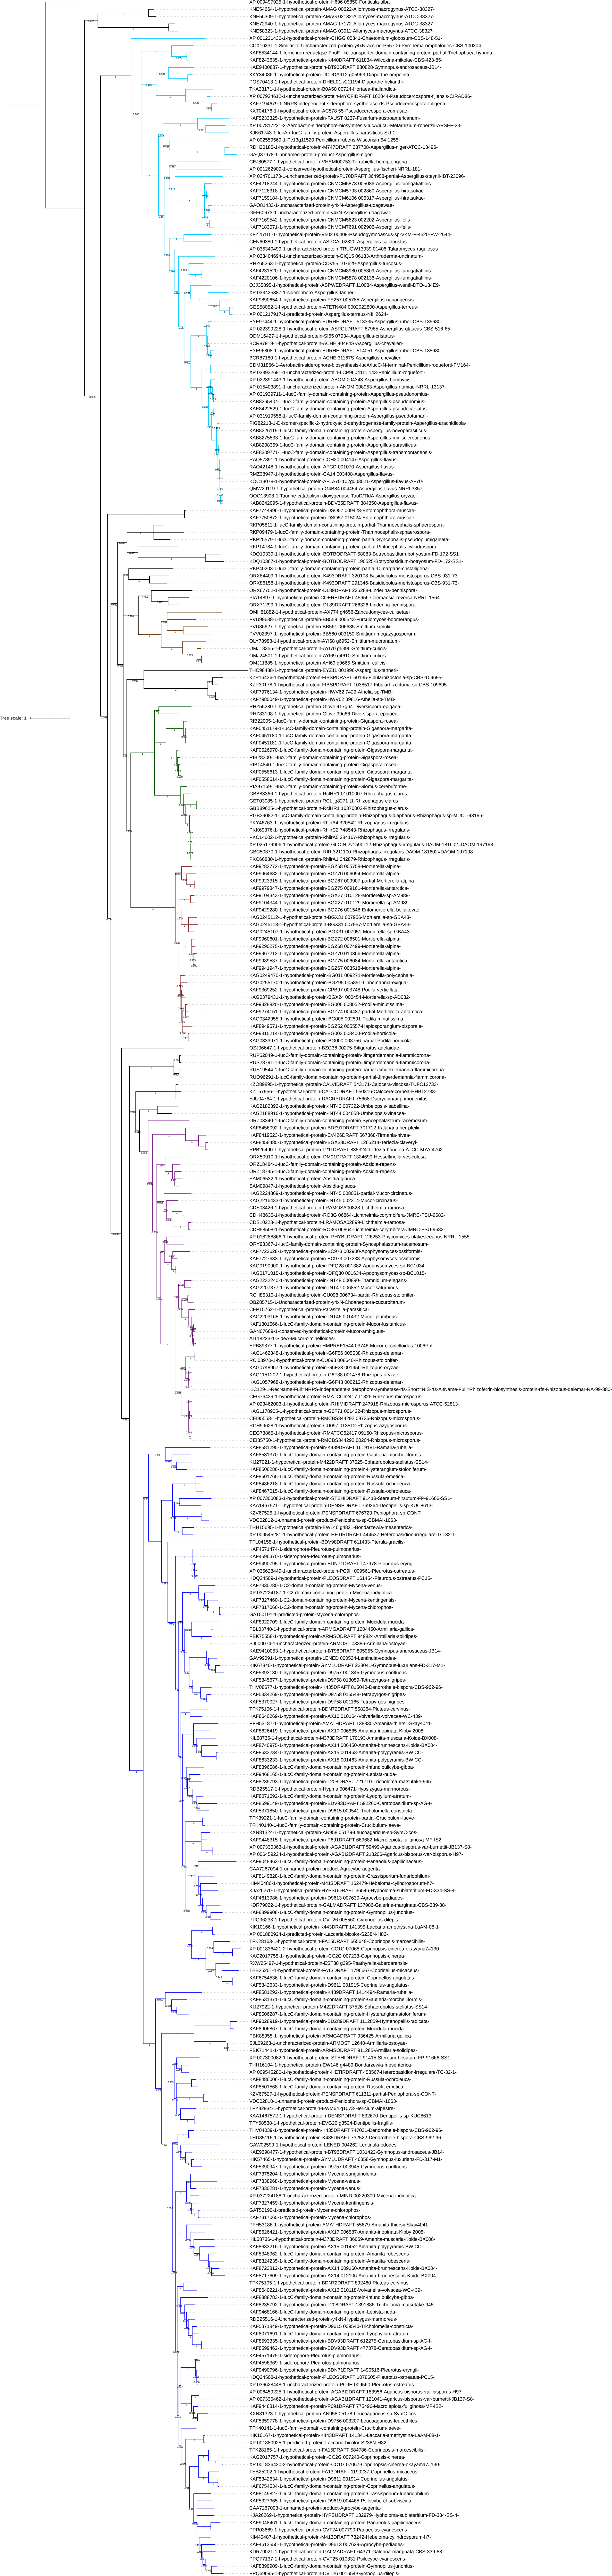

Supplement: s1 [file s1]
